# Supplementary material
Source: publisher figshare collection journal article supplement (https://gsajournals.figshare.com/ndownloader/files/20156867)
Supplement: Supplementary file 1 [file 20156867]

## Sheet: NAM.SAP.Traits.Genes.QTL
NAM_SNP	SNP	PVE	Trait	Model	Gene_id	Sorghum.Ortholog	Similarity_Ortholog	Homology	Model.Trait
S1_63043663	S1_63011488	0.1	LBL	NJL	DEP1	Sobic.001G341700	14.8	Paralog	LBL.GLM
S10_56303321	S10_56315692	0.6	LBL	JL	APO1	Sobic.010G220400	89.9	Ortholog	LBL.GLM
S2_63475769	S2_63474083	1.7	LBL	NJL	OsSPL14	Sobic.002G247800	64.3	Paralog	LBL.GLM
S2_63576699	S2_63566632	2.2	LBL	JL	OsSPL14	Sobic.002G247800	64.3	Paralog	LBL.GLM
S4_66931632	S4_66896087	2.6	LBL	JL	TAW1	Sobic.004G338400	58.8	Paralog	LBL.GLM
S7_59953003	S7_59918857	0.5	RL	NJL	Dw3	Sobic.007G163800	NA	Ortholog	LBL.GLM
S7_59953003	S7_59918857	1.8	LBL	NJL	Dw3	Sobic.007G163800	NA	Ortholog	LBL.GLM
S2_63475769	S2_63511714	1.7	LBL	NJL	OsSPL14	Sobic.002G247800	64.3	Paralog	LBL.CMLM
S2_63576699	S2_63570201	2.2	LBL	JL	OsSPL14	Sobic.002G247800	64.3	Paralog	LBL.CMLM
S7_59953003	S7_59909181	0.5	RL	NJL	Dw3	Sobic.007G163800	NA	Ortholog	LBL.CMLM
S7_59953003	S7_59909181	1.8	LBL	NJL	Dw3	Sobic.007G163800	NA	Ortholog	LBL.CMLM
S1_63011488	S1_62982908	1.1	RL	JL	DEP1	Sobic.001G341700	14.8	Paralog	RL.GLM
S10_56311879	S10_56271748	1.2	RL	JL	APO1	Sobic.010G220400	89.9	Ortholog	RL.GLM
S3_4757321	S3_4707964	3.2	UBL	NJL	ra2	Sobic.003G052900	92.7	Ortholog	RL.GLM
S4_58277149	S4_58228067	0.9	RL	JL	ra3	Sobic.004G232900.	68.3	Paralog	RL.GLM
S7_59751994	S7_59752074	2.9	RL	JL	Dw3	Sobic.007G163800	NA	Ortholog	RL.GLM
S7_59751994	S7_59752074	2.9	RL	JL	spi1	Sobic.007G163200	62	Paralog	RL.GLM
S1_63011488	S1_62982908	1.1	RL	JL	DEP1	Sobic.001G341700	14.8	Paralog	RL.CMLM
S10_56311879	S10_56271748	1.2	RL	JL	APO1	Sobic.010G220400	89.9	Ortholog	RL.CMLM
S3_4757321	S3_4707964	3.2	UBL	NJL	ra2	Sobic.003G052900	92.7	Ortholog	RL.CMLM
S4_58277149	S4_58228067	0.9	RL	JL	ra3	Sobic.004G232900.	68.3	Paralog	RL.CMLM
S7_59751994	S7_59752074	2.9	RL	JL	Dw3	Sobic.007G163800	NA	Ortholog	RL.CMLM
S7_59751994	S7_59752074	2.9	RL	JL	spi1	Sobic.007G163200	62	Paralog	RL.CMLM

## Sheet: GWAS of QTL and Precipitation
SNP	Chromosome	Position	pval.glm	maf	pval.mlm.kin	Additive.Effect	PVE	Trait	Model	Gene.Name	Sorghum.Ortholog
S1_20673686	1	20673686	4.00257e-06	0.0868196	0.521425	5	1.4	RL	NJL	TAWAWA1 (TAW1)	Sobic.001G219400
S1_6775611	1	6775611	0.00356037	0.475034	0.803177	1	0.6	LBL	JL	Panicle Phytomer2 (PAP2)	Sobic.001G086400
S10_56303321	10	56303321	0.000929603	0.234818	0.555956	1	0.6	LBL	JL	Abberant Panicle Organization (APO1)	Sobic.010G220400
S10_56311879	10	56311879	0.0620672	0.242915	0.325549	6	1.2	RL	JL	Abberant Panicle Organization (APO1)	Sobic.010G220400
S2_60856616	2	60856616	1.96702e-06	0.47166	0.869281	0	0.4	RD	JL	DENSE AND ERECT PANICLE (OsDEP1)	Sobic.002G216600
S3_4750709	3	4750709	2.37337e-05	0.415205	0.640235	-5	3.8	UBL	MLMM	Ramosa2 (ra2)	Sobic.003G052900
S3_4757321	3	4757321	0.780592	0.154296	0.48277	-4	3.2	UBL	NJL	Ramosa2 (ra2)	Sobic.003G052900
S7_59751994	7	59751994	1.41341e-09	0.21435	0.969105	8	4.4	LBL	MLMM	Falvin Monooxygenase (YUCCA5)	Sobic.007G163200
S7_59953003	7	59953003	0.242818	0.464687	0.740319	2	1.8	LBL	NJL	Dwarf3(Dw3)	Sobic.007G163800
